# Supplementary material for: Factors Influencing Acceptance of Grasshoppers and Other Insects as Food: A Comparison between Two Cities in Malaysia
Source: MDPI journal article supplement (doi:10.3390/foods11203284), 2022-10-20
Supplement: s1 [file s1]

## Supplementary data

Figure S1: The schematic drawing of the questionnaire used in the study.

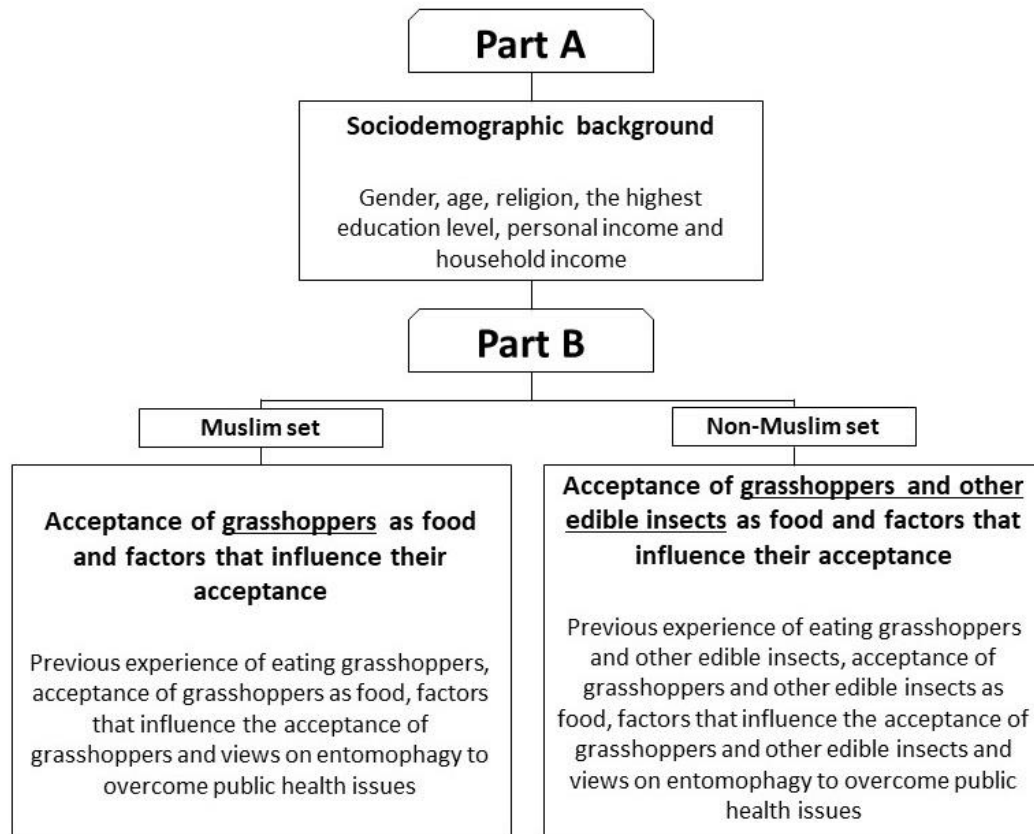

Figure S2: Type of channels that the respondents get to know about entomophagy

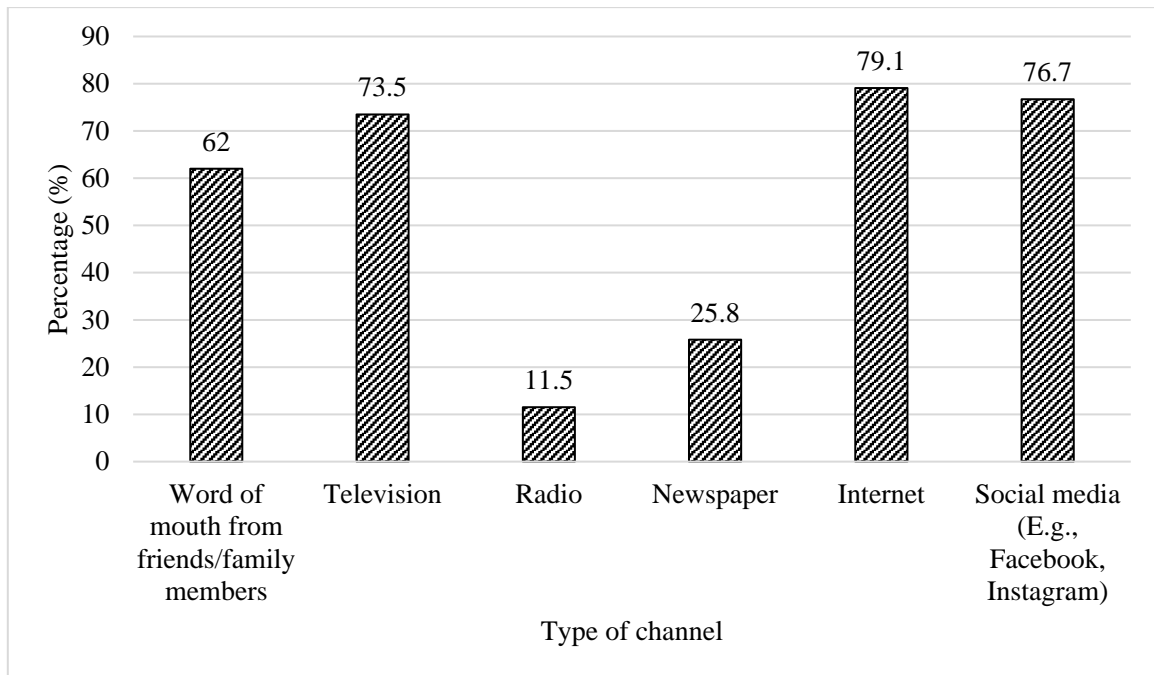

Figure S3: Type of insects consumed by non-Muslim respondents

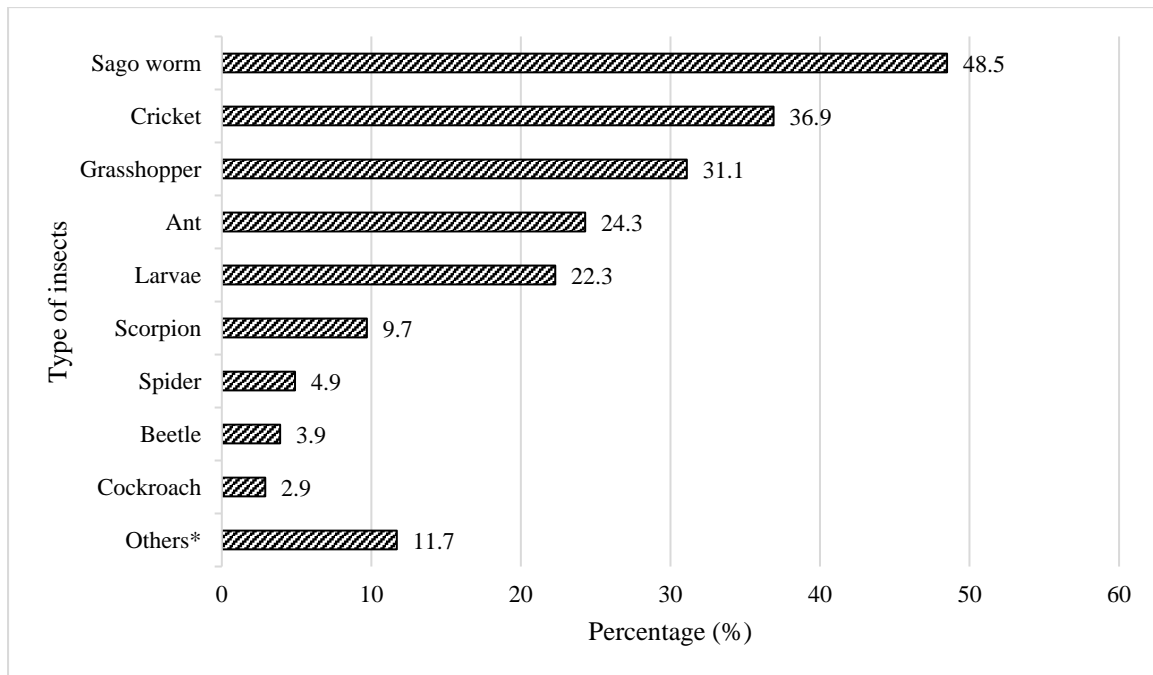

\*Mealworm, Silkworm, Bee and Black Soldier Fly

Figure S4: Reasonable price for 100g of grasshopper/insects

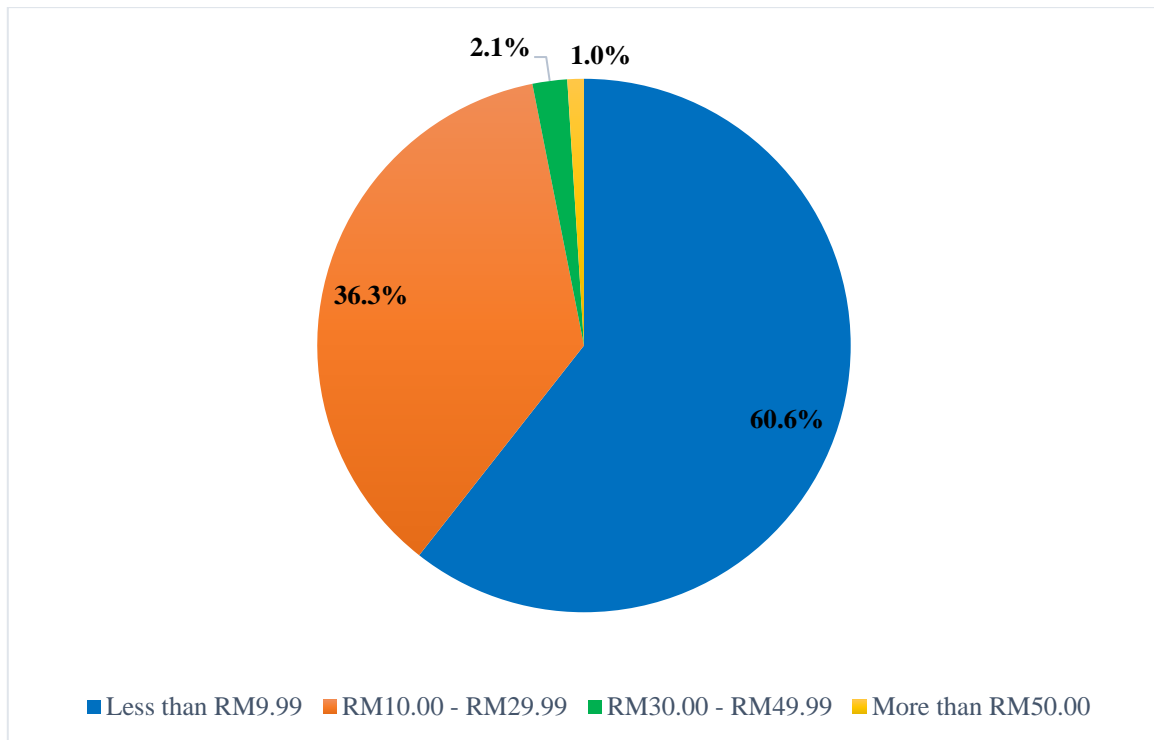

\*RM, Malaysian Ringgit; 1USD = RM 4.481 as of 29 August 2022

Table S1: Acceptance of grasshoppers/other insects as food based on sociodemographic and socioeconomic characteristics

| Sociodemographic<br>Characterises | Will you accept eating grasshoppers/insects as food?<br>n (%) |            |                   |                         |           |                   |                    |            |                   |
|-----------------------------------|---------------------------------------------------------------|------------|-------------------|-------------------------|-----------|-------------------|--------------------|------------|-------------------|
|                                   | All<br>(n=292)                                                |            |                   | Klang Valley<br>(n=144) |           |                   | Kuching<br>(n=148) |            |                   |
|                                   | Yes                                                           | No         | <i>p</i><br>value | Yes                     | No        | <i>p</i><br>value | Yes                | No         | <i>p</i><br>value |
| <b>Sex</b>                        |                                                               |            |                   |                         |           |                   |                    |            |                   |
| Male                              | 42 (45.2)                                                     | 51 (54.8)  | <i>p</i> <0.001   | 26 (53.1)               | 23 (46.9) | <i>p</i> <0.001   | 16 (36.4)          | 28 (63.6)  | 0.126             |
| Female                            | 46 (23.1)                                                     | 153 (76.9) |                   | 21 (22.1)               | 74 (77.9) |                   | 25 (24.0)          | 79 (76.0)  |                   |
| <b>Age group</b>                  |                                                               |            |                   |                         |           |                   |                    |            |                   |
| 18 – 29 years old                 | 61 (26.6)                                                     | 168 (73.4) | 0.042             | 27 (27.3)               | 72 (72.7) | 0.140             | 34 (26.2)          | 96 (73.8)  | 0.244             |
| 30 – 39 years old                 | 18 (48.6)                                                     | 19 (51.4)  |                   | 15 (46.9)               | 17 (53.1) |                   | 3 (60.0)           | 2 (40.0)   |                   |
| 40 – 49 years old                 | 7(38.9)                                                       | 11(61.1)   |                   | 4 (36.4)                | 7 (63.6)  |                   | 3 (42.9)           | 4 (57.1)   |                   |
| 50 years old and above            | 2 (40.0)                                                      | 6 (75.0)   |                   | 1 (50.0)                | 1 (50.0)  |                   | 1 (16.7)           | 5 (83.3)   |                   |
| <b>Religion</b>                   |                                                               |            |                   |                         |           |                   |                    |            |                   |
| Muslim                            | 18 (27.3)                                                     | 48 (72.7)  | 0.564             | 18 (32.1)               | 38 (67.9) | 0.919             | 0 (0.0)            | 10 (100.0) | 0.062             |
| Non-Muslim                        | 70 (31.0)                                                     | 156 (69.0) |                   | 29 (33.0)               | 59 (67.0) |                   | 41 (29.7)          | 97 (70.3)  |                   |

To be continue...

...continue

|                                    | Will you accept eating grasshoppers/insects as food?<br>n (%) |            |                   |                         |           |                   |                    |            |                   |
|------------------------------------|---------------------------------------------------------------|------------|-------------------|-------------------------|-----------|-------------------|--------------------|------------|-------------------|
| Sociodemographic<br>Characterises  | All<br>(n=292)                                                |            |                   | Klang Valley<br>(n=144) |           |                   | Kuching<br>(n=148) |            |                   |
|                                    | Yes                                                           | No         | <i>p</i><br>value | Yes                     | No        | <i>p</i><br>value | Yes                | No         | <i>p</i><br>value |
| <b>Highest education level</b>     |                                                               |            |                   |                         |           |                   |                    |            |                   |
| Primary                            | 0(0.0)                                                        | 1(100.0)   | 0.562             | 0(0.0)                  | 0(0.0)    | 0.568             | 0(0.0)             | 1(100.0)   | 0.695             |
| Secondary                          | 41(27.7)                                                      | 107(72.3)  |                   | 18(30.0)                | 42(70.0)  |                   | 23(26.1)           | 65(73.9)   |                   |
| Tertiary                           | 47(32.9)                                                      | 96(67.1)   |                   | 29(34.5)                | 55(65.5)  |                   | 18(30.5)           | 41(69.5)   |                   |
| <b>Occupation</b>                  |                                                               |            |                   |                         |           |                   |                    |            |                   |
| Government/Semi-government servant | 11 (45.8)                                                     | 13 (54.2)  | 0.014             | 8 (53.3)                | 7 (46.7)  | 0.046             | 3 (33.3)           | 6 (66.7)   | 0.221             |
| Private worker                     | 29 (41.4)                                                     | 41 (58.6)  |                   | 20 (44.4)               | 25 (55.6) |                   | 9 (36.0)           | 16 (64.0)  |                   |
| Self-employed                      | 3 (25.0)                                                      | 9 (75.0)   |                   | 1 (16.7)                | 5 (83.3)  |                   | 2 (33.3)           | 4 (66.7)   |                   |
| Unpaid worker/Unemployed/Retired   | 3 (12.0)                                                      | 22 (88.0)  |                   | 3 (20.0)                | 12 (80.0) |                   | 0 (0.0)            | 10 (100.0) |                   |
| Students                           | 42 (26.1)                                                     | 119 (73.9) |                   | 15 (23.8)               | 48 (76.2) |                   | 27 (27.6)          | 71 (72.4)  |                   |

To be continue...

...continue

| Sociodemographic<br>Characterises  | Will you accept eating grasshoppers/insects as food? |            |                   |                         |           |                   |                    |           |                   |
|------------------------------------|------------------------------------------------------|------------|-------------------|-------------------------|-----------|-------------------|--------------------|-----------|-------------------|
|                                    | n (%)                                                |            |                   |                         |           |                   |                    |           |                   |
|                                    | All<br>(n=292)                                       |            |                   | Klang Valley<br>(n=144) |           |                   | Kuching<br>(n=148) |           |                   |
|                                    | Yes                                                  | No         | <i>p</i><br>value | Yes                     | No        | <i>p</i><br>value | Yes                | No        | <i>p</i><br>value |
| <b>Personal income<sup>1</sup></b> |                                                      |            |                   |                         |           |                   |                    |           |                   |
| RM 1799 and below*                 | 41 (24.4)                                            | 127 (75.6) | 0.010             | 15 (22.1)               | 53 (77.9) | 0.052             | 26 (26.0)          | 74 (74.0) | 0.060             |
| RM 1800 – RM 2600                  | 7 (33.3)                                             | 14 (66.7)  |                   | 4 (50.0)                | 4 (50.0)  |                   | 3 (23.1)           | 10 (76.9) |                   |
| RM 2601 – RM 5499                  | 23 (47.9)                                            | 25 (52.1)  |                   | 15 (42.9)               | 20 (57.1) |                   | 8 (61.5)           | 5 (38.5)  |                   |
| RM 5500 and above                  | 11 (42.3)                                            | 15 (57.7)  |                   | 9 (42.9)                | 12 (67.4) |                   | 2 (40.0)           | 3 (60.0)  |                   |
| <b>Household income**2</b>         |                                                      |            |                   |                         |           |                   |                    |           |                   |
| Less than RM 4860<br>(B40 group)   | 18 (19.1)                                            | 76 (80.9)  | 0.057             | 6 (20.0)                | 24 (80.0) | 0.240             | 12 (18.8)          | 52 (81.3) | 0.245             |
| RM 4860 – RM 10959<br>(M40 group)  | 36 (32.4)                                            | 75 (67.6)  |                   | 20 (31.7)               | 43 (68.3) |                   | 16 (33.3)          | 32 (66.7) |                   |
| More than RM 10960<br>(T20 group)  | 14 (35.0)                                            | 26 (72.2)  |                   | 12 (40.0)               | 18 (60.0) |                   | 2 (24.6)           | 8 (75.4)  |                   |

<sup>1</sup>Percentage of personal income were based on 263 respondents: Klang Valley 132 respondents; Kuching 131 respondents

<sup>2</sup>Percentage of household income were based on 245 respondents: Klang Valley: 123 respondents; Kuching: 122 respondents

\*RM, Malaysian Ringgit; 1USD = RM 4.481 as of 29 August 2022

\*\*Source: Household Income and Basic Amenities Survey Report 2019, Department of Statistics Malaysia

Significant difference was determined using Chi-square or Fisher Exact test

Table S2: Willingness to eat grasshoppers/other insects as food in daily life based on sociodemographic and socioeconomic characteristics

| Sociodemographic<br>Characterises | Are you willing to eat grasshoppers/insects as food in your daily life? |            |                   |                         |           |                   |                    |            |                   |
|-----------------------------------|-------------------------------------------------------------------------|------------|-------------------|-------------------------|-----------|-------------------|--------------------|------------|-------------------|
|                                   | n (%)                                                                   |            |                   |                         |           |                   |                    |            |                   |
|                                   | All<br>(n=292)                                                          |            |                   | Klang Valley<br>(n=144) |           |                   | Kuching<br>(n=148) |            |                   |
|                                   | Yes                                                                     | No         | <i>p</i><br>value | Yes                     | No        | <i>p</i><br>value | Ya                 | Tidak      | <i>p</i><br>value |
| <b>Sex</b>                        |                                                                         |            |                   |                         |           |                   |                    |            |                   |
| Male                              | 26 (28.0)                                                               | 67 (72.0)  | 0.003             | 15 (30.6)               | 34 (69.4) | 0.009             | 11 (25.0)          | 33 (75.0)  | 0.122             |
| Female                            | 27 (13.6)                                                               | 172 (86.4) |                   | 12 (12.6)               | 83 (87.4) |                   | 15 (14.4)          | 89 (85.6)  |                   |
| <b>Age group</b>                  |                                                                         |            |                   |                         |           |                   |                    |            |                   |
| 18 – 29 years old                 | 37 (16.2)                                                               | 192 (83.8) | 0.226             | 17 (17.2)               | 82 (82.8) | 0.736             | 20 (15.4)          | 110 (84.6) | 0.090             |
| 30 – 39 years old                 | 10 (27.0)                                                               | 27 (73.0)  |                   | 8 (25.0)                | 24 (75.0) |                   | 2 (40.0)           | 3 (60.0)   |                   |
| 40 – 49 years old                 | 5 (27.8)                                                                | 13 (72.2)  |                   | 2 (18.2)                | 9 (81.8)  |                   | 3 (42.9)           | 4 (57.1)   |                   |
| 50 years old and above            | 1 (18.2)                                                                | 7 (87.5)   |                   | 0 (0.0)                 | 2 (100.0) |                   | 1 (16,7)           | 5 (83.3)   |                   |
| <b>Religion</b>                   |                                                                         |            |                   |                         |           |                   |                    |            |                   |
| Muslim                            | 9 (13.6)                                                                | 57 (86.4)  | 0.279             | 9 (16.1)                | 47 (83.9) | 0.511             | 0 (0.0)            | 10 (100.0) | 0.210             |
| Non-Muslim                        | 44 (19.5)                                                               | 182 (80.5) |                   | 18 (20.5)               | 70 (79.5) |                   | 26 (18.8)          | 112 (81.2) |                   |

To be continue...



...continue

| Are you willing to eat grasshoppers/insects as food in your daily life? |                |            |                   |                         |            |                   |                    |            |                   |
|-------------------------------------------------------------------------|----------------|------------|-------------------|-------------------------|------------|-------------------|--------------------|------------|-------------------|
| n (%)                                                                   |                |            |                   |                         |            |                   |                    |            |                   |
| Sociodemographic<br>Characterises                                       | All<br>(n=292) |            |                   | Klang Valley<br>(n=144) |            |                   | Kuching<br>(n=148) |            |                   |
|                                                                         | Yes            | No         | <i>p</i><br>value | Yes                     | No         | <i>p</i><br>value | Yes                | No         | <i>p</i><br>value |
| <b>Highest education level</b>                                          |                |            |                   |                         |            |                   |                    |            |                   |
| Primary                                                                 | 0(0.0)         | 1(100.0)   | 0.322             | 0(0.0)                  | 0(0.0)     | 0.914             | 0(0.0)             | 1(100.0)   | 0.117             |
| Secondary                                                               | 22(14.9)       | 126(85.1)  |                   | 11(18.3)                | 49(81.7)   |                   | 11(12.5)           | 77(87.5)   |                   |
| Tertiary                                                                | 31(21.7)       | 112(78.3)  |                   | 16(19.0)                | 68(81.0)   |                   | 15(25.4)           | 44(74.6)   |                   |
| <b>Occupation</b>                                                       |                |            |                   |                         |            |                   |                    |            |                   |
| Government/Semi-government servant                                      | 6 (25.0)       | 18 (75.0)  | 0.001             | 4 (26.7)                | 11 (73.3)  | 0.059             | 2 (22.2)           | 7 (77.8)   | 0.006             |
| Private worker                                                          | 22 (31.4)      | 48 (68.6)  |                   | 13 (28.9)               | 32 (71.1)  |                   | 9 (36.0)           | 16 (64.0)  |                   |
| Self-employed                                                           | 3 (25.0)       | 9 (75.0)   |                   | 0 (0.0)                 | 6 (100.0)  |                   | 3 (50.0)           | 3 (50.0)   |                   |
| Unpaid worker/                                                          | 0 (0.0)        | 25 (100.0) |                   | 0 (0.0)                 | 15 (100.0) |                   | 0 (0.0)            | 10 (100.0) |                   |
| Unemployed/Retired                                                      |                |            |                   |                         |            |                   |                    |            |                   |
| Students                                                                | 22 (13.7)      | 139 (86.3) |                   | 10 (15.9)               | 53 (84.1)  |                   | 12 (12.2)          | 86 (87.8)  |                   |

To be continue...

...continue

| Sociodemographic<br>Characterises     | Are you willing to eat grasshoppers/insects as food in your daily life? |            |                   |                         |           |                   |                    |           |                   |
|---------------------------------------|-------------------------------------------------------------------------|------------|-------------------|-------------------------|-----------|-------------------|--------------------|-----------|-------------------|
|                                       | n (%)                                                                   |            |                   |                         |           |                   |                    |           |                   |
|                                       | All<br>(n=292)                                                          |            |                   | Klang Valley<br>(n=144) |           |                   | Kuching<br>(n=148) |           |                   |
|                                       | Yes                                                                     | No         | <i>p</i><br>value | Yes                     | No        | <i>p</i><br>value | Yes                | No        | <i>p</i><br>value |
| <b>Personal income<sup>1</sup></b>    |                                                                         |            |                   |                         |           |                   |                    |           |                   |
| RM 1799 and below*                    | 23 (13.7)                                                               | 145 (86.3) | 0.028             | 9 (13.2)                | 59 (86.8) | 0.357             | 14 (14.0)          | 86 (86.0) | 0.016             |
| RM 1800 – RM 2600                     | 4 (19.0)                                                                | 17 (81.0)  |                   | 1 (12.5)                | 7 (87.5)  |                   | 3 (23.1)           | 10 (76.9) |                   |
| RM 2601 – RM 5499                     | 15 (31.3)                                                               | 33 (68.8)  |                   | 9 (25.7)                | 26 (74.3) |                   | 6 (46.2)           | 7 (53.8)  |                   |
| RM 5500 and above                     | 7 (26.9)                                                                | 19 (73.1)  |                   | 5 (23.9)                | 16 (76.2) |                   | 2 (40.0)           | 3 (60.0)  |                   |
| <b>Household income**<sup>2</sup></b> |                                                                         |            |                   |                         |           |                   |                    |           |                   |
| Less than RM 4860<br>(B40 group)      | 7 (7.4)                                                                 | 87 (92.6)  | 0.008             | 3 (10.0)                | 27 (90.0) | 0.215             | 4 (6.3)            | 60 (93.8) | 0.016             |
| RM 4860 – RM 10959<br>(M40 group)     | 20 (18.0)                                                               | 91 (82.0)  |                   | 10 (15.9)               | 53 (84.1) |                   | 10 (20.8)          | 38 (79.2) |                   |
| More than RM 10960<br>(T20 group)     | 11 (27.5)                                                               | 29 (72.5)  |                   | 8 (26.7)                | 22 (73.3) |                   | 3 (30.0)           | 7 (70.0)  |                   |

<sup>1</sup>Percentage of personal income were based on 263 respondents: Klang Valley 132 respondents; Kuching 131 respondents

<sup>2</sup>Percentage of household income were based on 245 respondents: Klang Valley: 123 respondents; Kuching: 122 respondents

\*RM, Malaysian Ringgit; 1USD = RM 4.481 as of 29 August 2022

\*\*Source: Household Income and Basic Amenities Survey Report 2019, Department of Statistics Malaysia

Significant difference was determined using Chi-square or Fisher Exact test

Table S3: Visual acceptability of respondents based on study location

| Forms of grasshoppers/ insects <sup>2</sup>     | Mean Rank<br>(n=292) |                         |                    | <i>p</i> value <sup>1</sup> |
|-------------------------------------------------|----------------------|-------------------------|--------------------|-----------------------------|
|                                                 | All<br>(n=292)       | Klang Valley<br>(n=144) | Kuching<br>(n=148) |                             |
| Roasted grasshoppers/insects                    | 2.64 <sup>a</sup>    | 2.59 <sup>a</sup>       | 2.68 <sup>a</sup>  | 0.380                       |
| Chocolate-coated<br>grasshoppers/insects        | 2.18 <sup>b</sup>    | 2.18 <sup>b</sup>       | 2.18 <sup>b</sup>  | 0.460                       |
| Cooked meal containing<br>grasshoppers/insects  | 2.40 <sup>c</sup>    | 2.43 <sup>c</sup>       | 2.39 <sup>c</sup>  | 0.254                       |
| Biscuit made with<br>grasshopper/insects' flour | 2.77 <sup>a</sup>    | 2.80 <sup>a</sup>       | 2.74 <sup>a</sup>  | 0.183                       |
| <b><i>p</i> value</b>                           | <i>p</i> <0.001***   | <i>p</i> <0.001***      | <i>p</i> <0.001*** |                             |

<sup>a,b,c</sup>Different letters in a column indicate significant differences ( $p<0.05$ ) using Friedman test and Post Hoc Wilcoxon signed rank test

<sup>1</sup>No significant different using Mann-Whitney U test

<sup>2</sup>Mean rank was reported
